# Supplementary material for: Characterization and clinical outcomes of outpatients with subacute or chronic post COVID-19 cough: a real-world study
Source: PeerJ. 2024 Dec 11;12:e18705. doi: 10.7717/peerj.18705 (PMC11645979; doi:10.7717/peerj.18705)
Supplement: Supplemental Information 1 [file peerj-12-18705-s001.xlsx]

## Sheet: forR_3
Patient_ID	Age	Age.cat	Gender	Cough_duration(week)	Cough_duration_cat	Expectoration	Dicomfort_of_throat	Asthma	Smoking_history	Hypertention	Diabetes	COVID_vaccination_count	COVID_vaccination_status	Postnasal_drip	Acid reflux or heartburn	CT/X-ray	WBC	CRP	FeNO	Cough_time	Shortness_of_breath	Prescription	Montelust	CMP_Capsules	ICS_LABA	CPD	Primary_VAS	VAS_14d	VAS_28d
P_01	54	>40y	female	8	≤8w	Yes	No	No	No	No	No	2	Vaccinated	No	No	Normal	NA	NA	NA	both	No	Yes	No	No	No	Yes	50	40	0
P_02	49	>40y	female	8	≤8w	Yes	No	No	No	No	No	2	Vaccinated	No	No	Normal	NA	NA	NA	both	No	Yes	No	No	No	Yes	50	40	0
P_03	34	≤40y	female	4	≤8w	No	No	No	No	No	No	2	Vaccinated	No	No	Normal	NA	NA	NA	night	No	Yes	No	No	Yes	No	60	10	0
P_04	28	≤40y	female	4	≤8w	No	No	No	No	No	No	2	Vaccinated	No	No	Normal	NA	NA	NA	night	No	Yes	No	No	Yes	No	60	10	0
P_05	56	>40y	male	4	≤8w	Yes	Yes	No	No	No	No	2	Vaccinated	No	No	Normal	NA	NA	NA	day	No	Yes	No	No	No	Yes	40	10	0
P_06	31	≤40y	female	4	≤8w	Yes	Yes	No	No	No	No	2	Vaccinated	No	No	Normal	NA	NA	NA	day	No	Yes	No	No	No	Yes	40	10	0
P_07	30	≤40y	male	8	≤8w	No	No	No	No	No	No	1	Vaccinated	No	No	Normal	Normal	Normal	10	both	No	Yes	Yes	Yes	Yes	No	60	30	10
P_08	63	>40y	female	8	≤8w	No	No	No	No	No	No	1	Vaccinated	No	No	Normal	Normal	Normal	10	both	No	Yes	Yes	Yes	Yes	No	60	30	10
P_09	55	>40y	female	8	≤8w	No	Yes	No	No	No	No	2	Vaccinated	No	No	Normal	NA	NA	NA	night	No	Yes	Yes	No	No	No	60	40	20
P_10	46	>40y	female	8	≤8w	No	Yes	No	No	No	No	2	Vaccinated	No	No	Normal	NA	NA	NA	night	No	Yes	Yes	No	No	No	60	40	20
P_11	73	>40y	female	12	>8w	Yes	Yes	No	No	No	No	0	Non-Vaccinated	No	No	Normal	Normal	Normal	0	night	No	Yes	Yes	Yes	No	No	70	60	60
P_12	31	≤40y	female	12	>8w	Yes	Yes	No	No	No	No	0	Non-Vaccinated	No	No	Normal	Normal	Normal	0	night	No	Yes	Yes	Yes	No	No	70	60	60
P_13	48	>40y	female	12	>8w	Yes	No	No	No	No	No	2	Vaccinated	No	No	Normal	NA	NA	NA	both	No	Yes	No	Yes	No	No	50	50	40
P_14	28	≤40y	female	12	>8w	Yes	No	No	No	No	No	2	Vaccinated	No	No	Normal	NA	NA	NA	both	No	Yes	No	Yes	No	No	50	50	40
P_15	62	>40y	female	3.5	≤8w	No	Yes	No	No	No	No	0	Non-Vaccinated	No	No	Normal	NA	NA	NA	day	No	Yes	No	Yes	No	No	60	10	0
P_16	33	≤40y	female	3.5	≤8w	No	Yes	No	No	No	No	0	Non-Vaccinated	No	No	Normal	NA	NA	NA	day	No	Yes	No	Yes	No	No	60	10	0
P_17	23	≤40y	female	4	≤8w	Yes	No	No	No	No	No	2	Vaccinated	No	No	Normal	NA	NA	NA	day	No	Yes	No	Yes	Yes	No	100	40	0
P_18	44	>40y	male	12	>8w	No	No	No	Yes	No	No	2	Vaccinated	No	No	Normal	NA	NA	NA	night	No	Yes	Yes	Yes	No	Yes	60	60	60
P_19	42	>40y	male	4	≤8w	Yes	No	No	No	No	No	2	Vaccinated	No	No	Normal	NA	NA	NA	day	No	Yes	No	Yes	Yes	No	100	40	0
P_20	31	≤40y	male	8	≤8w	No	No	No	Yes	No	No	2	Vaccinated	No	No	Normal	NA	NA	NA	night	No	Yes	Yes	Yes	No	Yes	60	60	60
P_21	63	>40y	female	36	>8w	No	Yes	No	No	Yes	Yes	0	Non-Vaccinated	No	No	Normal	NA	NA	NA	day	No	Yes	No	Yes	Yes	No	50	50	50
P_22	37	≤40y	male	39	>8w	No	Yes	No	No	Yes	Yes	0	Non-Vaccinated	No	No	Normal	NA	NA	NA	day	No	Yes	No	Yes	Yes	No	50	50	50
P_23	46	>40y	female	1	≤8w	No	Yes	No	No	No	No	2	Vaccinated	No	No	Normal	NA	NA	NA	night	No	Yes	Yes	Yes	Yes	No	70	20	0
P_24	75	>40y	male	1	≤8w	No	Yes	No	No	No	No	2	Vaccinated	No	No	Normal	NA	NA	NA	night	No	Yes	Yes	Yes	Yes	No	70	20	0
P_25	49	>40y	female	24	>8w	No	No	No	No	No	No	0	Non-Vaccinated	No	No	Normal	NA	NA	6	night	No	Yes	No	No	Yes	No	60	60	30
P_26	48	>40y	male	24	>8w	No	No	No	No	No	No	0	Non-Vaccinated	No	No	Normal	NA	NA	6	night	No	Yes	No	No	Yes	No	60	60	30
P_27	27	≤40y	female	3	≤8w	No	No	No	No	No	No	3	Vaccinated	No	No	Normal	NA	NA	18	night	Yes	Yes	No	Yes	Yes	No	75	25	0
P_28	47	>40y	male	33	>8w	Yes	No	No	Yes	No	No	3	Vaccinated	No	No	Normal	NA	NA	NA	night	No	Yes	No	Yes	Yes	No	80	10	30
P_29	37	≤40y	male	3	≤8w	No	No	No	No	No	No	3	Vaccinated	No	No	Normal	NA	NA	18	night	Yes	Yes	No	Yes	Yes	No	75	25	0
P_30	59	>40y	male	32	>8w	Yes	No	No	Yes	No	No	3	Vaccinated	No	No	Normal	NA	NA	NA	night	No	Yes	No	Yes	Yes	No	80	10	30
P_31	31	≤40y	female	4	≤8w	No	Yes	No	No	No	No	3	Vaccinated	No	No	Normal	NA	NA	NA	night	No	Yes	No	No	Yes	No	65	10	0
P_32	43	>40y	female	4	≤8w	No	Yes	No	No	No	No	3	Vaccinated	No	No	Normal	NA	NA	NA	night	No	Yes	No	No	Yes	No	65	10	0
P_33	63	>40y	female	3	≤8w	No	No	No	No	No	No	0	Non-Vaccinated	No	No	Normal	NA	NA	NA	day	No	Yes	Yes	Yes	No	No	50	35	20
P_34	25	≤40y	female	12	>8w	Yes	No	No	No	No	No	3	Vaccinated	No	No	Normal	NA	NA	NA	night	No	Yes	Yes	Yes	No	No	80	40	40
P_35	43	>40y	female	12	>8w	Yes	No	No	No	No	No	2	Vaccinated	No	No	Normal	NA	NA	NA	night	No	Yes	Yes	Yes	No	No	40	45	40
P_36	30	≤40y	female	3	≤8w	Yes	Yes	No	No	No	No	2	Vaccinated	No	No	Normal	NA	NA	NA	both	No	Yes	Yes	Yes	Yes	No	60	10	20
P_37	71	>40y	female	3	≤8w	No	No	No	No	No	No	0	Non-Vaccinated	No	No	Normal	NA	NA	NA	day	No	Yes	Yes	Yes	No	No	50	35	20
P_38	42	>40y	male	12	>8w	Yes	No	No	No	No	No	3	Vaccinated	No	No	Normal	NA	NA	NA	night	No	Yes	Yes	Yes	No	No	80	40	40
P_39	37	≤40y	male	8	≤8w	Yes	No	No	No	No	No	2	Vaccinated	No	No	Normal	NA	NA	NA	night	No	Yes	Yes	Yes	No	No	40	45	40
P_40	36	≤40y	male	3	≤8w	Yes	Yes	No	No	No	No	2	Vaccinated	No	No	Normal	NA	NA	NA	both	No	Yes	Yes	Yes	Yes	No	60	10	20
P_41	75	>40y	male	2	≤8w	Yes	No	No	No	No	No	0	Non-Vaccinated	No	No	Normal	Normal	Normal	NA	day	No	Yes	No	Yes	No	No	60	30	0
P_42	69	>40y	female	24	>8w	Yes	No	No	No	Yes	No	3	Vaccinated	No	No	Normal	NA	NA	NA	night	No	Yes	No	Yes	No	Yes	70	0	0
P_43	28	≤40y	female	3	≤8w	No	No	No	No	No	No	3	Vaccinated	No	No	Normal	NA	NA	NA	both	No	Yes	No	No	Yes	No	80	55	50
P_44	47	>40y	male	3	≤8w	Yes	No	No	No	No	No	0	Non-Vaccinated	No	No	Normal	Normal	Normal	NA	day	No	Yes	No	Yes	No	No	60	30	0
P_45	16	≤40y	male	24	>8w	Yes	No	No	No	Yes	No	3	Vaccinated	No	No	Normal	NA	NA	NA	night	No	Yes	No	Yes	No	Yes	70	0	0
P_46	42	>40y	male	3	≤8w	No	No	No	No	No	No	3	Vaccinated	No	No	Normal	NA	NA	NA	both	No	Yes	No	No	Yes	No	80	55	50
P_47	36	≤40y	female	3	≤8w	No	Yes	No	No	No	No	2	Vaccinated	No	No	Normal	Normal	NA	17	night	No	Yes	Yes	Yes	No	No	50	25	10
P_48	43	>40y	female	3	≤8w	No	No	No	No	No	No	3	Vaccinated	No	No	Normal	NA	NA	26	night	No	Yes	No	No	Yes	No	70	50	25
P_49	73	>40y	female	3	≤8w	No	Yes	No	No	No	No	2	Vaccinated	No	No	Normal	Normal	NA	17	night	No	Yes	Yes	Yes	No	No	50	25	10
P_50	37	≤40y	female	3	≤8w	No	No	No	No	No	No	3	Vaccinated	No	No	Normal	NA	NA	26	night	No	Yes	No	No	Yes	No	70	50	25
P_51	27	≤40y	female	3	≤8w	No	No	No	No	No	No	3	Vaccinated	No	No	Normal	NA	NA	NA	night	No	Yes	Yes	Yes	No	No	50	0	0
P_52	30	≤40y	male	3	≤8w	No	No	No	No	No	No	3	Vaccinated	No	No	Normal	NA	NA	NA	night	No	Yes	Yes	Yes	No	No	50	0	0
P_53	28	≤40y	female	4	≤8w	Yes	Yes	No	No	No	No	0	Non-Vaccinated	No	No	Normal	NA	NA	10	night	No	Yes	Yes	Yes	No	No	70	20	0
P_54	56	>40y	male	4	≤8w	Yes	Yes	No	No	No	No	0	Non-Vaccinated	No	No	Normal	NA	NA	10	night	No	Yes	Yes	Yes	No	No	70	20	0
P_55	49	>40y	female	24	>8w	No	Yes	No	No	No	No	0	Non-Vaccinated	No	No	Normal	NA	NA	NA	both	No	Yes	No	No	No	Yes	40	30	40
P_56	53	>40y	female	40	>8w	Yes	Yes	No	No	No	No	2	Vaccinated	No	No	Normal	NA	NA	NA	day	No	No	No	No	No	No	30	30	30
P_57	47	>40y	female	24	>8w	No	Yes	No	No	No	No	0	Non-Vaccinated	No	No	Normal	NA	NA	NA	both	No	Yes	No	No	No	Yes	40	30	40
P_58	44	>40y	male	24	>8w	Yes	Yes	No	No	No	No	2	Vaccinated	No	No	Normal	NA	NA	NA	day	No	No	No	No	No	No	30	30	30
P_59	33	≤40y	female	24	>8w	Yes	Yes	No	No	No	No	2	Vaccinated	No	No	Normal	NA	NA	12	both	No	Yes	No	No	No	Yes	50	50	50
P_60	58	>40y	female	24	>8w	Yes	Yes	No	No	No	No	2	Vaccinated	No	No	Normal	NA	NA	12	both	No	Yes	No	No	No	Yes	50	50	50
P_61	42	>40y	male	4	≤8w	No	No	No	No	No	No	3	Vaccinated	No	No	Normal	NA	NA	NA	day	No	Yes	No	No	Yes	No	30	20	10
P_62	71	>40y	female	4	≤8w	No	No	No	No	No	No	3	Vaccinated	No	No	Normal	NA	NA	NA	day	No	Yes	No	No	Yes	No	30	20	10
P_63	28	≤40y	female	3	≤8w	No	No	No	No	No	No	2	Vaccinated	No	No	Normal	NA	NA	NA	day	No	Yes	No	No	No	Yes	20	0	0
P_64	37	≤40y	male	24	>8w	No	No	No	Yes	No	No	2	Vaccinated	No	No	Normal	NA	NA	NA	day	No	Yes	Yes	No	No	No	60	50	40
P_65	45	>40y	female	3	≤8w	No	No	No	No	No	No	2	Vaccinated	No	No	Normal	NA	NA	NA	day	No	Yes	No	No	No	Yes	20	0	0
P_66	27	≤40y	female	24	>8w	No	No	No	Yes	No	No	2	Vaccinated	No	No	Normal	NA	NA	NA	day	No	Yes	Yes	No	No	No	60	50	40
P_67	28	≤40y	female	4	≤8w	No	Yes	No	No	No	No	3	Vaccinated	No	No	Normal	NA	NA	NA	day	No	Yes	No	No	No	Yes	60	40	30
P_68	58	>40y	female	4	≤8w	No	Yes	No	No	No	No	3	Vaccinated	No	No	Normal	NA	NA	NA	day	No	Yes	No	No	No	Yes	60	40	30
P_69	36	≤40y	male	4	≤8w	Yes	No	No	No	No	No	2	Vaccinated	No	No	Normal	NA	NA	17	night	No	Yes	Yes	Yes	No	No	60	10	0
P_70	24	≤40y	female	4	≤8w	Yes	No	No	No	No	No	2	Vaccinated	No	No	Normal	NA	NA	17	night	No	Yes	Yes	Yes	No	No	60	10	0
P_71	16	≤40y	male	36	>8w	No	Yes	No	No	No	No	2	Vaccinated	No	No	Normal	NA	NA	NA	both	No	Yes	Yes	Yes	No	No	60	60	60
P_72	22	≤40y	female	36	>8w	No	Yes	No	No	No	No	2	Vaccinated	No	No	Normal	NA	NA	NA	both	No	Yes	Yes	Yes	No	No	60	60	60
P_73	33	≤40y	female	8	≤8w	Yes	No	No	No	No	No	0	Non-Vaccinated	No	No	Normal	NA	NA	NA	night	No	Yes	Yes	No	No	No	70	70	60
P_74	49	>40y	female	8	≤8w	Yes	No	No	No	No	No	0	Non-Vaccinated	No	No	Normal	NA	NA	NA	night	No	Yes	Yes	No	No	No	70	70	60
P_75	42	>40y	male	3	≤8w	Yes	Yes	No	Yes	No	No	0	Non-Vaccinated	No	No	Normal	NA	NA	NA	both	No	Yes	No	No	No	Yes	50	40	40
P_76	46	>40y	female	3	≤8w	Yes	Yes	No	Yes	No	No	0	Non-Vaccinated	No	No	Normal	NA	NA	NA	both	No	Yes	No	No	No	Yes	50	40	40
P_77	24	≤40y	female	8	≤8w	Yes	Yes	No	No	No	No	2	Vaccinated	No	No	Normal	NA	NA	28	day	No	Yes	No	No	Yes	Yes	30	10	0
P_78	49	>40y	female	8	≤8w	No	Yes	No	No	No	No	0	Non-Vaccinated	No	No	Normal	NA	NA	20	both	No	Yes	No	Yes	No	Yes	40	25	25
P_79	36	≤40y	female	8	≤8w	Yes	Yes	No	No	No	No	2	Vaccinated	No	No	Normal	NA	NA	28	day	No	Yes	No	No	Yes	Yes	30	10	0
P_80	24	≤40y	female	8	≤8w	No	Yes	No	No	No	No	0	Non-Vaccinated	No	No	Normal	NA	NA	20	both	No	Yes	No	Yes	No	Yes	40	25	25
P_81	55	>40y	female	28	>8w	No	Yes	No	No	No	No	3	Vaccinated	No	No	Normal	NA	NA	5	both	No	Yes	No	No	Yes	No	70	20	0
P_82	26	≤40y	female	3	≤8w	Yes	Yes	No	No	No	No	1	Vaccinated	No	No	Normal	Normal	Normal	NA	night	No	Yes	No	Yes	No	No	50	50	50
P_83	55	>40y	female	28	>8w	No	Yes	No	No	No	No	3	Vaccinated	No	No	Normal	NA	NA	5	both	No	Yes	No	No	Yes	No	70	20	0
P_84	26	≤40y	female	3	≤8w	Yes	Yes	No	No	No	No	1	Vaccinated	No	No	Normal	Normal	Normal	NA	night	No	Yes	No	Yes	No	No	50	50	50
P_85	48	>40y	male	4	≤8w	Yes	Yes	No	No	No	No	4	Vaccinated	No	No	Normal	NA	NA	NA	both	No	Yes	No	Yes	No	No	60	20	0
P_86	42	>40y	male	4	≤8w	No	Yes	No	No	No	No	2	Vaccinated	No	No	Normal	NA	NA	NA	both	No	Yes	No	Yes	No	No	40	10	0
P_87	33	≤40y	female	4	≤8w	Yes	Yes	No	No	No	No	4	Vaccinated	No	No	Normal	NA	NA	NA	both	No	Yes	No	Yes	No	No	60	20	0
P_88	28	≤40y	female	4	≤8w	No	Yes	No	No	No	No	2	Vaccinated	No	No	Normal	NA	NA	NA	both	No	Yes	No	Yes	No	No	40	10	0
P_89	45	>40y	female	12	>8w	Yes	No	No	No	No	No	2	Vaccinated	No	No	Normal	NA	NA	66	night	No	Yes	Yes	Yes	Yes	No	70	30	30
P_90	63	>40y	female	8	≤8w	Yes	No	No	No	No	No	2	Vaccinated	No	No	Normal	NA	NA	66	night	No	Yes	Yes	Yes	Yes	No	70	30	30
P_91	31	≤40y	female	8	≤8w	No	Yes	No	No	No	No	2	Vaccinated	No	No	Normal	NA	NA	NA	night	No	Yes	No	Yes	No	No	30	20	0
P_92	53	>40y	female	8	≤8w	No	Yes	No	No	No	No	2	Vaccinated	No	No	Normal	NA	NA	NA	night	No	Yes	No	Yes	No	No	30	20	0
P_93	37	≤40y	male	4	≤8w	No	Yes	No	No	No	No	2	Vaccinated	No	No	Normal	NA	NA	NA	both	No	Yes	No	Yes	No	No	80	50	50
P_94	28	≤40y	female	4	≤8w	No	Yes	No	No	No	No	2	Vaccinated	No	No	Normal	NA	NA	NA	both	No	Yes	No	Yes	No	No	80	50	50
P_95	24	≤40y	female	8	≤8w	No	Yes	No	No	No	No	2	Vaccinated	No	No	Normal	NA	NA	NA	night	No	Yes	Yes	Yes	No	No	50	0	0
P_96	49	>40y	female	8	≤8w	No	Yes	No	No	No	No	2	Vaccinated	No	No	Normal	NA	NA	NA	night	No	Yes	Yes	Yes	No	No	50	0	0
P_97	22	≤40y	female	3	≤8w	Yes	No	No	No	No	No	3	Vaccinated	No	No	Normal	NA	NA	NA	night	No	Yes	No	No	Yes	No	50	10	0
P_98	25	≤40y	female	3	≤8w	Yes	No	No	No	No	No	3	Vaccinated	No	No	Normal	NA	NA	NA	night	No	Yes	No	No	Yes	No	50	10	0
P_99	37	≤40y	male	4	≤8w	No	Yes	No	Yes	No	No	3	Vaccinated	No	No	Normal	NA	NA	NA	night	No	No	No	No	No	No	55	30	20
P_100	43	>40y	female	4	≤8w	No	Yes	No	Yes	No	No	3	Vaccinated	No	No	Normal	NA	NA	NA	night	No	No	No	No	No	No	60	30	20
P_101	46	>40y	female	3	≤8w	No	No	No	No	No	No	2	Vaccinated	No	No	Normal	NA	NA	NA	both	No	Yes	No	Yes	No	No	30	10	0
P_102	43	>40y	female	3	≤8w	No	No	No	No	No	No	2	Vaccinated	No	No	Normal	NA	NA	NA	both	No	Yes	No	Yes	No	No	30	10	0
P_103	31	≤40y	male	8	≤8w	No	No	No	No	No	No	2	Vaccinated	No	No	Normal	NA	NA	NA	day	No	No	No	No	No	No	55	30	25
P_104	59	>40y	male	24	>8w	No	Yes	No	No	No	No	3	Vaccinated	No	No	Normal	NA	NA	NA	night	No	Yes	No	No	No	Yes	40	40	20
P_105	69	>40y	female	8	≤8w	No	No	No	No	No	No	2	Vaccinated	No	No	Normal	NA	NA	NA	night	No	No	No	No	No	No	55	10	0
P_106	27	≤40y	female	8	≤8w	No	Yes	No	No	No	No	3	Vaccinated	No	No	Normal	NA	NA	NA	night	No	Yes	No	No	No	Yes	40	40	20
P_107	41	>40y	male	4	≤8w	No	Yes	No	No	No	No	3	Vaccinated	No	No	Normal	NA	NA	NA	both	No	Yes	No	No	No	Yes	30	30	20
P_108	30	≤40y	female	4	≤8w	No	Yes	No	No	No	No	3	Vaccinated	No	No	Normal	NA	NA	NA	both	No	Yes	No	No	No	Yes	30	30	20
P_109	58	>40y	female	44	>8w	No	No	No	No	No	No	2	Vaccinated	No	No	Normal	Normal	Normal	22	both	No	Yes	No	Yes	No	No	20	20	20
P_110	27	≤40y	female	44	>8w	No	No	No	No	No	No	2	Vaccinated	No	No	Normal	Normal	Normal	22	both	No	Yes	No	Yes	No	No	20	20	20
P_111	27	≤40y	female	48	>8w	No	No	No	No	No	No	2	Vaccinated	No	No	Normal	NA	NA	NA	night	No	Yes	No	No	Yes	Yes	50	30	20
P_112	23	≤40y	female	48	>8w	No	No	No	No	No	No	2	Vaccinated	No	No	Normal	NA	NA	NA	night	No	Yes	No	No	Yes	Yes	50	30	20
P_113	43	>40y	female	16	>8w	No	Yes	No	No	No	No	2	Vaccinated	No	No	Normal	Normal	Normal	0	night	No	Yes	No	Yes	No	No	70	50	30
P_114	54	>40y	female	16	>8w	No	Yes	No	No	No	No	2	Vaccinated	No	No	Normal	Normal	Normal	0	night	No	Yes	No	Yes	No	No	70	50	30
P_115	37	≤40y	female	8	≤8w	No	No	No	No	No	No	3	Vaccinated	No	No	Normal	NA	NA	NA	both	No	Yes	Yes	Yes	No	No	50	0	0
P_116	71	>40y	female	8	≤8w	Yes	Yes	No	No	Yes	No	3	Vaccinated	No	No	Normal	NA	NA	17	night	No	Yes	Yes	Yes	No	No	70	70	70
P_117	48	>40y	female	8	≤8w	No	No	No	No	No	No	3	Vaccinated	No	No	Normal	NA	NA	NA	both	No	Yes	Yes	Yes	No	No	50	0	0
P_118	62	>40y	female	8	≤8w	Yes	Yes	No	No	Yes	No	3	Vaccinated	No	No	Normal	NA	NA	17	night	No	Yes	Yes	Yes	No	No	70	70	70
P_119	47	>40y	female	8	≤8w	Yes	Yes	No	Yes	No	No	3	Vaccinated	No	No	Normal	NA	NA	NA	both	No	Yes	No	Yes	Yes	No	70	50	30
P_120	58	>40y	female	20	>8w	No	Yes	No	No	No	No	3	Vaccinated	No	No	Normal	NA	NA	NA	both	No	Yes	No	Yes	No	No	50	30	10
P_121	28	≤40y	male	7	≤8w	No	Yes	No	No	No	No	3	Vaccinated	No	No	Normal	Normal	Normal	NA	both	No	Yes	No	Yes	No	No	60	40	30
P_122	34	≤40y	female	8	≤8w	Yes	Yes	No	Yes	No	No	3	Vaccinated	No	No	Normal	NA	NA	NA	both	No	Yes	No	Yes	Yes	No	70	50	30
P_123	41	>40y	male	20	>8w	No	Yes	No	No	No	No	3	Vaccinated	No	No	Normal	NA	NA	NA	both	No	Yes	No	Yes	No	No	50	30	10
P_124	28	≤40y	male	28	>8w	No	Yes	No	No	No	No	3	Vaccinated	No	No	Normal	Normal	Normal	NA	both	No	Yes	No	Yes	No	No	60	40	30
P_125	71	>40y	female	8	≤8w	Yes	Yes	No	No	Yes	No	3	Vaccinated	No	No	Normal	NA	NA	17	night	No	Yes	Yes	No	Yes	No	70	60	60
P_126	55	>40y	female	8	≤8w	Yes	Yes	No	No	Yes	No	3	Vaccinated	No	No	Normal	NA	NA	17	night	No	Yes	Yes	No	Yes	No	70	60	60
P_127	26	≤40y	male	12	>8w	No	Yes	No	No	No	No	3	Vaccinated	No	No	Normal	NA	NA	NA	night	No	Yes	No	No	Yes	No	70	50	0
P_128	50	>40y	female	4	≤8w	Yes	Yes	No	No	No	No	3	Vaccinated	No	No	Normal	NA	NA	NA	night	No	Yes	Yes	Yes	No	No	75	50	40
P_129	34	≤40y	female	5	≤8w	No	No	No	No	No	No	3	Vaccinated	No	No	Normal	NA	NA	NA	night	No	No	No	No	No	No	50	50	40
P_130	35	≤40y	male	3	≤8w	No	No	No	Yes	No	No	3	Vaccinated	No	No	Normal	NA	NA	NA	night	No	Yes	No	Yes	Yes	No	70	30	10
P_131	58	>40y	female	24	>8w	No	Yes	No	No	Yes	Yes	3	Vaccinated	No	No	Normal	NA	NA	NA	both	No	No	No	No	No	No	50	40	30
P_132	24	≤40y	female	48	>8w	No	No	No	No	No	No	3	Vaccinated	No	No	Normal	Normal	Normal	4	night	No	No	No	No	No	No	50	40	40
P_133	34	≤40y	female	3	≤8w	No	No	No	No	No	No	3	Vaccinated	No	No	Normal	NA	NA	32	night	No	Yes	Yes	Yes	Yes	No	75	40	10
P_134	41	>40y	male	7	≤8w	Yes	No	No	Yes	No	No	3	Vaccinated	No	No	Normal	NA	NA	NA	day	No	No	No	No	No	No	60	50	50
P_135	24	≤40y	female	8	≤8w	Yes	Yes	No	No	No	No	2	Vaccinated	No	No	Normal	NA	NA	28	day	No	Yes	No	No	No	Yes	40	10	0
P_136	55	>40y	male	28	>8w	No	Yes	No	No	Yes	No	3	Vaccinated	No	No	Normal	NA	NA	5	both	No	Yes	No	No	Yes	No	80	20	10
P_137	24	≤40y	female	8	≤8w	Yes	Yes	No	Yes	No	No	2	Vaccinated	No	No	Normal	NA	NA	28	day	No	Yes	No	Yes	No	Yes	50	10	0
P_138	23	≤40y	female	4	≤8w	Yes	No	No	No	No	No	2	Vaccinated	No	No	Normal	NA	NA	NA	day	No	Yes	No	Yes	Yes	No	90	30	0
P_139	28	≤40y	female	4	≤8w	Yes	Yes	No	No	No	No	0	Non-Vaccinated	No	No	Normal	NA	NA	10	night	No	Yes	Yes	Yes	No	No	100	20	10
P_140	55	>40y	male	28	>8w	No	Yes	No	Yes	No	Yes	0	Non-Vaccinated	No	No	Normal	NA	NA	31	both	No	Yes	No	No	Yes	No	70	20	0
P_141	31	≤40y	male	9	>8w	No	No	No	Yes	No	No	2	Vaccinated	No	No	Normal	NA	NA	NA	night	No	Yes	Yes	Yes	No	No	55	10	0
